# Supplementary material
Source: Elsevier journal article supplement (https://www.sciencedirect.com/science/article/pii/S0300289620300557)
Supplement: mmc1 [file S0300289620300557:mmc1.pdf]

**Supplementary Table 1.** Assays used in the KRAS mutation analysis in plasma.

| <b>KRAS Mutation</b> | <b>Assay</b>                                                                    |
|----------------------|---------------------------------------------------------------------------------|
| p.G12C c.34C>T       | AH0JEUD-KRAS_516                                                                |
| p.G12V c.35G>T       | AHX1IHY-KRAS_520                                                                |
| p.G12A c.35G>C       | AHPAVDP-KRAS_522                                                                |
| p.G12R c.34G>C       | AHMSYXY-KRAS_518                                                                |
| p.G12D c.35G>A       | AH6R5PI-KRAS_521                                                                |
| p.G13C C.37G>T       | AHRSRP5-KRAS_527                                                                |
| p.G13D c.38G>A       | AHD2BW0-KRAS_532                                                                |
| p.G12F and p.G12E    | Custom assays using Custom TaqMan® Assay Design Tool (Thermo Fisher Scientific) |

**Supplementary Table 2.** Plasma/tumor biopsy group.

|                                                   | Plasma/Tumor biopsy group<br>(51 biopsies /49 patients) |
|---------------------------------------------------|---------------------------------------------------------|
| Age, median (range)*                              | 60 (45-82)                                              |
| Sex, n (%)*                                       |                                                         |
| Male                                              | 34 (69%)                                                |
| Female                                            | 15 (31%)                                                |
| Smoking status, n (%)*                            |                                                         |
| Never                                             | 4 (8%)                                                  |
| Former                                            | 13 (27%)                                                |
| Active                                            | 32 (65%)                                                |
| Number of biopsies per patient, n (%)             |                                                         |
| 1 biopsy                                          | 47 (96%)                                                |
| 2 biopsies                                        | 2 (4%)                                                  |
| Disease extension, n (%)**                        |                                                         |
| Limited to thorax                                 | 14 (27%)                                                |
| Extrathoracic                                     | 37 (73%)                                                |
| Number of metastatic locations, n (%)**           |                                                         |
| 0                                                 | 5 (10%)                                                 |
| 1                                                 | 17 (33%)                                                |
| 2                                                 | 12 (23%)                                                |
| 3                                                 | 6 (12%)                                                 |
| 4                                                 | 5 (10%)                                                 |
| 5                                                 | 4 (8%)                                                  |
| 6                                                 | 1 (2%)                                                  |
| 8                                                 | 1 (2%)                                                  |
| Liver metastases, n (%)**                         |                                                         |
| No                                                | 41 (80%)                                                |
| Yes                                               | 10 (20%)                                                |
| Type of biopsy and KRAS mutation in tissue, n (%) |                                                         |
| Codon 12                                          | 49 (96%)                                                |
| Gly12Cys                                          | 22 (43%)                                                |
| Gly12Val                                          | 9 (17%)                                                 |
| Gly12Ala                                          | 7 (14%)                                                 |
| Gly12Asp                                          | 6 (12%)                                                 |
| Gly12Phe                                          | 2 (4%)                                                  |
| Gly12Arg                                          | 2 (4%)                                                  |
| Gly12Glu                                          | 1 (2%)                                                  |
| Codon 13                                          | 2 (4%)                                                  |
| Gly13Cys                                          | 2 (4%)                                                  |
| Days between biopsy-plasma, median (range)        | 19 (-53 – 94)                                           |

\*n=2 (patients with more than one biopsy were counted only 1 time.

\*\*At the moment of tumor biopsy

**Supplementary Table 3.** Treatment monitoring group.

|                                                | Treatment monitoring group<br>(52 treatment lines /32 patients) |
|------------------------------------------------|-----------------------------------------------------------------|
| Age, median (range)*                           | 59 (51-82)                                                      |
| Sex, n (%)*                                    |                                                                 |
| Male                                           | 23 (72%)                                                        |
| Female                                         | 9 (28%)                                                         |
| Smoking status, n (%)*                         |                                                                 |
| Never                                          | 2 (6%)                                                          |
| Former                                         | 9 (28%)                                                         |
| Active                                         | 21 (66%)                                                        |
| Number of treatment lines per patient, n (%) * |                                                                 |
| 1                                              | 19 (60%)                                                        |
| 2                                              | 8 (25%)                                                         |
| 3                                              | 3 (9%)                                                          |
| 4                                              | 2 (6%)                                                          |
| Treatment line, n (%)                          |                                                                 |
| No treatment                                   | 5 (10%)                                                         |
| 1                                              | 24 (46%)                                                        |
| 2                                              | 13 (25%)                                                        |
| 3                                              | 7 (13%)                                                         |
| 4                                              | 2 (4%)                                                          |
| 5                                              | 1 (2%)                                                          |
| Treatment type, n (%)                          |                                                                 |
| No treatment                                   | 5 (10%)                                                         |
| Carboplatin – Pemetrexed                       | 12 (22%)                                                        |
| Cisplatin – Pemetrexed                         | 9 (16%)                                                         |
| Docetaxel                                      | 5 (10%)                                                         |
| Nivolumab                                      | 4 (8%)                                                          |
| Vinorelbine                                    | 3 (6%)                                                          |
| Abemaciclib**                                  | 3 (6%)                                                          |
| Carboplatin - Gemcitabine                      | 2 (4%)                                                          |
| Carboplatin - Vinorelbine                      | 1 (2%)                                                          |
| Pemetrexed                                     | 1 (2%)                                                          |
| Erlotinib                                      | 1 (2%)                                                          |
| Paclitaxel                                     | 1 (2%)                                                          |
| Docetaxel – Custirsen**                        | 1 (2%)                                                          |
| Carboplatin – Paclitaxel – Atezolizumab**      | 1 (2%)                                                          |
| Carboplatin – Paclitaxel - RT                  | 1 (2%)                                                          |
| Cisplatin – Vinorelbine - RT                   | 1 (2%)                                                          |
| RT                                             | 1 (2%)                                                          |
| Disease stage, n (%)***                        |                                                                 |
| III                                            | 3 (6%)                                                          |
| IVa                                            | 10 (19%)                                                        |
| IVb                                            | 1 (1%)                                                          |
| IVc                                            | 38 (74%)                                                        |

| Number of metastatic locations, n (%)** |          |
|-----------------------------------------|----------|
| 0                                       | 3 (6%)   |
| 1                                       | 14 (27%) |
| 2                                       | 14 (27%) |
| 3                                       | 11 (21%) |
| 4                                       | 5 (9%)   |
| 5                                       | 3 (6%)   |
| 6                                       | 1 (2%)   |
| 7                                       | 1 (2%)   |
| Liver metastases, n (%)**               |          |
| No                                      | 46 (89%) |
| Yes                                     | 6 (11%)  |
| RECIST radiological response, n (%)     |          |
| Disease progression                     | 26 (50%) |
| Stable disease                          | 15 (29%) |
| Partial response                        | 11 (21%) |

\* n=20 (patients with more than one analyzed treatment line were counted only 1 time)

\*\* Clinical trial

\*\*\* At the beginning of the studied treatment line

RT: Radiotherapy; RECIST: Radiological Evaluation Criteria In Solid Tumors

**Supplementary Table 4.** Details on analyzed treatment lines of cases in the treatment monitoring group.

| Line of treatment                                                          | Therapy          | Days between plasma predicting RESP and CT | Days between plasma correlating RESP and CT | Days between plasma predicting PROG and CT | Days between plasma correlating PROG and CT | PFS (months) |
|----------------------------------------------------------------------------|------------------|--------------------------------------------|---------------------------------------------|--------------------------------------------|---------------------------------------------|--------------|
| <b>Patient #1 / Analyzed treatment lines: 1 / Follow-up: 3.25 months</b>   |                  |                                            |                                             |                                            |                                             |              |
| 2 <sup>nd</sup> line                                                       | Docetaxel        | No RESP                                    | No RESP                                     | No plasma                                  | 26                                          | 1.87         |
| <b>Patient #3 / Analyzed treatment lines: 1 / Follow-up: 8.31 months</b>   |                  |                                            |                                             |                                            |                                             |              |
| 2 <sup>nd</sup> line                                                       | Docetaxel        | 54                                         | 11                                          | No plasma                                  | 20                                          | 6.24         |
| <b>Patient #5 / Analyzed treatment lines: 2 / Follow-up: 18.43 months</b>  |                  |                                            |                                             |                                            |                                             |              |
| 1 <sup>st</sup> line                                                       | BSC              | No RESP                                    | No RESP                                     | No plasma                                  | 16                                          | 8.19         |
| 2 <sup>nd</sup> line                                                       | VRL              | No RESP                                    | No RESP                                     | No plasma                                  | 16                                          | 2.46         |
| <b>Patient #9 / Analyzed treatment lines: 4 / Follow-up: 30.29 months</b>  |                  |                                            |                                             |                                            |                                             |              |
| 1 <sup>st</sup> line                                                       | CBDCA - Pem      | No RESP                                    | No RESP                                     | 120                                        | 13                                          | 12.81        |
| 2 <sup>nd</sup> line                                                       | BSC              | No RESP                                    | No RESP                                     | No plasma                                  | 4                                           | 1.47         |
| 3 <sup>rd</sup> line                                                       | Abemaciclib*     | No RESP                                    | No RESP                                     | No plasma                                  | 10                                          | 3.22         |
| 4 <sup>th</sup> line                                                       | VRL              | No RESP                                    | No RESP                                     | No prediction of PROG                      | 9                                           | 1.77         |
| <b>Patient #12 / Analyzed treatment lines: 2 / Follow-up: 14.78 months</b> |                  |                                            |                                             |                                            |                                             |              |
| 2 <sup>nd</sup> line                                                       | CBDCA - Pem      | 42                                         | 7                                           | No plasma                                  | 14                                          | 5.03         |
| 3 <sup>rd</sup> line                                                       | Abemaciclib*     | No RESP                                    | No RESP                                     | No prediction of PROG                      | 11                                          | 1.25         |
| <b>Patient #13 / Analyzed treatment lines: 2 / Follow-up: 17.12 months</b> |                  |                                            |                                             |                                            |                                             |              |
| 2 <sup>nd</sup> line                                                       | BSC              | No RESP                                    | No RESP                                     | No plasma                                  | 7                                           | 5.5          |
| 3 <sup>rd</sup> line                                                       | CBDCA - Gem      | 59                                         | 3                                           | 65                                         | 23                                          | 9.03         |
| <b>Patient #15 / Analyzed treatment lines: 4 / Follow-up: 11.93 months</b> |                  |                                            |                                             |                                            |                                             |              |
| 1 <sup>st</sup> line                                                       | CBDCA - VRL      | No plasma                                  | No RESP                                     | No plasma                                  | 16                                          | 4.14         |
| 2 <sup>nd</sup> line                                                       | Pem              | No RESP                                    | No RESP                                     | No PROG prediction                         | 3                                           | 1.77         |
| 3 <sup>rd</sup> line                                                       | CBDCA - Gem      | No RESP                                    | No RESP                                     | 13                                         | 8                                           | 1.81         |
| 4 <sup>th</sup> line                                                       | Erlotinib*       | No RESP                                    | No RESP                                     | No plasma                                  | 7                                           | 1.12         |
| <b>Patient #17 / Analyzed treatment lines: 1 / Follow-up: 1.61</b>         |                  |                                            |                                             |                                            |                                             |              |
| 1 <sup>st</sup> line                                                       | CBDCA - Pem      | No RESP                                    | No RESP                                     | No plasma                                  | 4                                           | 1.02         |
| <b>Patient #19 / Analyzed treatment lines: 1 / Follow-up: 14.39 months</b> |                  |                                            |                                             |                                            |                                             |              |
| 1 <sup>st</sup> line                                                       | CBDCA – VRL + RT | No plasma                                  | No plasma                                   | No plasma                                  | 18                                          | 5.85         |
| <b>Patient #22 / Analyzed treatment lines: 3 / Follow-up: 53.39 months</b> |                  |                                            |                                             |                                            |                                             |              |
| 1 <sup>st</sup> line                                                       | Cis - Pem        | No plasma                                  | 16                                          | No plasma                                  | 9                                           | 6.87         |
| 2 <sup>nd</sup> line                                                       | RT               | No plasma                                  | 6                                           | No plasma                                  | 15                                          | 18.92        |
| 3 <sup>rd</sup> line                                                       | Paclitaxel       | 67                                         | 3                                           | No plasma                                  | No plasma                                   | 19.06        |
| <b>Patient #24 / Analyzed treatment lines: 1 / Follow-up: 3.48 months</b>  |                  |                                            |                                             |                                            |                                             |              |
| 1 <sup>st</sup> line                                                       | CBDCA - Pem      | No RESP                                    | No RESP                                     | No plasma                                  | 2                                           | 2            |
| <b>Patient #25 / Analyzed treatment lines: 1 / Follow-up: 13.08 months</b> |                  |                                            |                                             |                                            |                                             |              |
| 5 <sup>th</sup> line                                                       | Nivolumab        | 54                                         | 2                                           | No plasma                                  | No plasma                                   | 8.08         |
| <b>Patient #26 / Analyzed treatment lines: 2 / Follow-up: 4.34 months</b>  |                  |                                            |                                             |                                            |                                             |              |
| 1 <sup>st</sup> line                                                       | Cis - Pem        | No RESP                                    | No RESP                                     | No plasma                                  | 7                                           | 1.61         |
| 2 <sup>nd</sup> line                                                       | Docetaxel        | No RESP                                    | No RESP                                     | No plasma                                  | 5                                           | 1.05         |
| <b>Patient #27 / Analyzed treatment lines: 1 / Follow-up: 8.94 months</b>  |                  |                                            |                                             |                                            |                                             |              |
| 1 <sup>st</sup> line                                                       | Cis - Pem        | No RESP                                    | No RESP                                     | No plasma                                  | 10                                          | 4.24         |

|                                                                            |                                    |                    |                          |                    |                          |       |
|----------------------------------------------------------------------------|------------------------------------|--------------------|--------------------------|--------------------|--------------------------|-------|
| <b>Patient #28 / Analyzed treatment lines: 3 / Follow-up: 19.29</b>        |                                    |                    |                          |                    |                          |       |
| 1 <sup>st</sup> line                                                       | CBDCA - Pem                        | No RESP            | No RESP                  | No PROG prediction | 10                       | 4.96  |
| 2 <sup>nd</sup> line                                                       | BSC                                | No RESP            | No RESP                  | 54                 | 27                       | 7.5   |
| 3 <sup>rd</sup> line                                                       | Nivolumab                          | No RESP            | No RESP                  | No PROG prediction | 6                        | 2.5   |
| <b>Patient #29 / Analyzed treatment lines: 1 / Follow-up: 3.58 months</b>  |                                    |                    |                          |                    |                          |       |
| 1 <sup>st</sup> line                                                       | CBDCA - Pem                        | No RESP            | No RESP                  | No plasma          | No concordance with PROG | 1.74  |
| <b>Patient #30 / Analyzed treatment lines: 1 / Follow-up: 1.58 months</b>  |                                    |                    |                          |                    |                          |       |
| 1 <sup>st</sup> line                                                       | CBDCA - Pem                        | No RESP            | No RESP                  | No plasma          | 0                        | 1.51  |
| <b>Patient #34 / Analyzed treatment lines: 1 / Follow-up: 11.86 months</b> |                                    |                    |                          |                    |                          |       |
| 1 <sup>st</sup> line                                                       | CBDCA - Pem                        | No plasma          | No plasma                | No plasma          | 8                        | 9.17  |
| <b>Patient #35 / Analyzed treatment lines: 1 / Follow-up: 17.71 months</b> |                                    |                    |                          |                    |                          |       |
| 1 <sup>st</sup> line                                                       | CBDCA - Pem                        | No respuesta       | No respuesta             | No plasma          | 2                        | 12.35 |
| <b>Patient #36 / Analyzed treatment lines: 1 / Follow-up: 40.41 months</b> |                                    |                    |                          |                    |                          |       |
| 1 <sup>st</sup> line                                                       | Cis - VRL + RT                     | 66                 | 3                        | No PROG            | No PROG                  | 40.21 |
| <b>Patient #37 / Analyzed treatment lines: 1 / Follow-up: 5.29 months</b>  |                                    |                    |                          |                    |                          |       |
| 1 <sup>st</sup> line                                                       | CBDCA - Pem                        | No plasma          | 8                        | 19                 | 5                        | 4.40  |
| <b>Patient #39 / Analyzed treatment lines: 3 / Follow-up: 14.72 months</b> |                                    |                    |                          |                    |                          |       |
| 1 <sup>st</sup> line                                                       | Cis - Pem                          | 14                 | 7                        | 60                 | 32                       | 7.72  |
| 2 <sup>nd</sup> line                                                       | Docetaxel                          | No RESP            | No RESP                  | 47                 | 13                       | 1.51  |
| 3 <sup>rd</sup> line                                                       | VRL                                | No RESP            | No RESP                  | 17                 | 4                        | 1.97  |
| <b>Patient #47 / Analyzed treatment lines: 1 / Follow-up: 6.01 months</b>  |                                    |                    |                          |                    |                          |       |
| 1 <sup>st</sup> line                                                       | BSC                                | No RESP            | No RESP                  | No plasma          | 14                       | 2.29  |
| <b>Patient #49 / Analyzed treatment lines: 2 / Follow-up: 27.8 months</b>  |                                    |                    |                          |                    |                          |       |
| 1 <sup>st</sup> line                                                       | CBDCA - Pem                        | No plasma          | No plasma                | No PROG prediction | 15                       | 11.47 |
| 2 <sup>nd</sup> line                                                       | Nivolumab                          | No RESP            | No RESP                  | 90                 | 41                       | 3.42  |
| <b>Patient #50 / Analyzed treatment lines: 2 / Follow-up: 20.14 months</b> |                                    |                    |                          |                    |                          |       |
| 1 <sup>st</sup> line                                                       | Cis - Pem                          | No RESP            | No RESP                  | No PROG prediction | 11                       | 1.91  |
| 2 <sup>nd</sup> line                                                       | Nivolumab                          | No RESP prediction | No concordance with RESP | 70                 | No plasma                | 16.13 |
| <b>Patient #51 / Analyzed treatment lines: 2 / Follow-up: 11.24 months</b> |                                    |                    |                          |                    |                          |       |
| 2 <sup>nd</sup> line                                                       | Docetaxel - Custirsen*             | No RESP            | No RESP                  | No plasma          | 1                        | 3.02  |
| 3 <sup>rd</sup> line                                                       | Abemaciclib*                       | 19                 | 9                        | 21                 | 23                       | 4.86  |
| <b>Patient #52 / Analyzed treatment lines: 2 / Follow-up: 22.77</b>        |                                    |                    |                          |                    |                          |       |
| 1 <sup>st</sup> line                                                       | Cis - Pem                          | 28                 | 3                        | 40                 | 23                       | 6.18  |
| 2 <sup>nd</sup> line                                                       | Docetaxel                          | 31                 | 10                       | No plasma          | No plasma                | 6.64  |
| <b>Patient #60 / Analyzed treatment lines: 1 / Follow-up: 17.28 months</b> |                                    |                    |                          |                    |                          |       |
| 1 <sup>st</sup> line                                                       | CBDCA - paclitaxel - atezolizumab* | 17                 | 4                        | No PROG            | No PROG                  | 13.31 |
| <b>Patient #61 / Analyzed treatment lines: 1 / Follow-up: 8.05 months</b>  |                                    |                    |                          |                    |                          |       |
| 1 <sup>st</sup> line                                                       | CBDCA - Pem                        | 20                 | 4                        | No PROG            | No PROG                  | 7.24  |
| <b>Patient #62 / Analyzed treatment lines: 1 / Follow-up: 9.89 months</b>  |                                    |                    |                          |                    |                          |       |
| 1 <sup>st</sup> line                                                       | Cis - Pem                          | 57                 | 15                       | No plasma          | No plasma                | 4.83  |
| <b>Patient #63 / Analyzed treatment lines: 1 / Follow-up: 12 months</b>    |                                    |                    |                          |                    |                          |       |
| 1 <sup>st</sup> line                                                       | Cis - Pem                          | 33                 | No plasma                | No PROG            | No PROG                  | 11.30 |

RESP, response; PROG, progression; CT, computed tomography; BSC, Best supportive care; CBDCA, carboplatin; Cis, cisplatin; Pem, pemetrexed; VRL, vinorelbine; Gem, gemcitabine; RT, radiotherapy.

\* Clinical trial

**Supplementary Table 5.** Bivariate analysis between *KRAS* mutational load dynamics and

|                                                                        | % Response<br>predicion | OR (CI 95%)    | % Progression<br>predicion | OR (CI 95%)     |
|------------------------------------------------------------------------|-------------------------|----------------|----------------------------|-----------------|
| Liver metastases: yes vs<br>no                                         | 100 vs 92.9             | 0.93 (0.8-1.1) | 75 vs 60                   | 2 (0.2-24.1)    |
| Disease limited to<br>thorax: yes vs no                                | 100 vs 90.9             | 1.1 (0.9-1.3)  | 50 vs 64.7                 | 1.83 (0.9-34.8) |
| Metastatic locations: ≤1<br>vs >1                                      | 6.7 vs 100              | 0.66 (0.3-1.4) | 50 vs 69.2                 | 2.25 (0.3-16.4) |
| GE: 1 <sup>st</sup> vs 2 <sup>nd</sup> and 3 <sup>rd</sup><br>tertiles | 75 vs 100               | 0.75 (0.4-1.3) | 100 vs 50                  | 2 (1.1-3.5)     |

radiological response and progression prediction.

OR, odds ratio; CI, confidence interval; GE, genomic equivalents.
